# Supplementary material
Source: PubMed Central journal article supplement (PMC10991121)
Supplement: 262_2020_2776_MOESM1_ESM.pdf [file 262_2020_2776_MOESM1_ESM.pdf]

**Supplementary Table S1. Clinicopathologic characteristics of pre-invasive carcinomas**

| <b>Characteristic</b>         | <b>No. (n=176)</b> |
|-------------------------------|--------------------|
| Age at diagnosis, years       |                    |
| Mean $\pm$ standard deviation | 48.3 $\pm$ 10.0    |
| Follow-up, years              |                    |
| Mean $\pm$ standard deviation | 6.7 $\pm$ 3.0      |
| Extent, cm                    |                    |
| Mean $\pm$ standard deviation | 3.2 $\pm$ 2.1      |
| Histological subtype          |                    |
| DCIS                          | 175 (99.4)         |
| Mixed DCIS and LCIS           | 1 (0.6)            |
| Nuclear grade                 |                    |
| Low                           | 11 (6.3)           |
| Intermediate                  | 98 (55.7)          |
| High                          | 67 (38.1)          |
| Comedo-type necrosis          |                    |
| Absent                        | 133 (75.6)         |
| Present                       | 43 (24.4)          |
| Estrogen receptor             |                    |
| Positive                      | 154 (87.5)         |
| Negative                      | 22 (12.5)          |
| Progesterone receptor         |                    |
| Positive                      | 134 (76.1)         |
| Negative                      | 83 (23.9)          |
| HER2 status                   |                    |
| Negative                      | 151 (85.8)         |
| Positive                      | 25 (14.2)          |
| Ki67 index                    |                    |
| Low (<10%)                    | 165 (93.8)         |
| High ( $\geq$ 10%)            | 11 (6.3)           |
| P53 overexpression            |                    |
| Absent                        | 155 (88.1)         |
| Present                       | 21 (11.9)          |
| Subtype                       |                    |
| Luminal A                     | 127 (72.2)         |
| Luminal B                     | 28 (15.9)          |
| HER2+                         | 8 (4.5)            |
| Triple negative               | 13 (7.4)           |
| Adjuvant radiation therapy    |                    |
| Not received                  | 71 (40.3)          |
| Received                      | 105 (59.7)         |
| Adjuvant hormonal therapy     |                    |
| Not received                  | 105 (59.7)         |
| Received                      | 71 (40.3)          |

Unless specified, number in parenthesis indicates percentage.

DCIS, ductal carcinoma in situ; LCIS, lobular carcinoma in situ

**Supplementary Table S2. Clinicopathologic characteristics of invasive carcinomas**

| <b>Characteristic</b>                 | <b>No. (n=524)</b> |
|---------------------------------------|--------------------|
| Age at diagnosis, years               |                    |
| Mean $\pm$ standard deviation         | 51.2 $\pm$ 11.8    |
| Follow up, years                      |                    |
| Mean $\pm$ standard deviation         | 9.4 $\pm$ 4.0      |
| T stage                               |                    |
| T1                                    | 246 (47.0)         |
| T2                                    | 251 (47.9)         |
| T3                                    | 19 (3.6)           |
| T4                                    | 8 (1.5)            |
| N stage                               |                    |
| N0                                    | 300 (57.3)         |
| N1                                    | 137 (26.1)         |
| N2                                    | 50 (9.5)           |
| N3                                    | 37 (7.1)           |
| Histologic subtype                    |                    |
| Invasive carcinoma of no special type | 456 (87.0)         |
| Invasive lobular carcinoma            | 20 (3.8)           |
| Mucinous carcinoma                    | 15 (2.9)           |
| Metaplastic carcinoma                 | 14 (2.7)           |
| Others                                | 19 (3.6)           |
| Histologic grade                      |                    |
| Low                                   | 94 (17.9)          |
| Intermediate                          | 166 (31.7)         |
| High                                  | 264 (50.4)         |
| Lymphovascular invasion               |                    |
| Absent                                | 296 (56.5)         |
| Present                               | 228 (43.5)         |
| Estrogen receptor                     |                    |
| Positive                              | 353 (67.4)         |
| Negative                              | 171 (32.6)         |
| Progesterone receptor                 |                    |
| Positive                              | 278 (53.1)         |
| Negative                              | 246 (46.9)         |
| HER2 status                           |                    |
| Negative                              | 404 (77.1)         |
| Positive                              | 120 (22.9)         |
| Ki67 index                            |                    |
| Low (<20%)                            | 301 (57.4)         |
| High ( $\geq$ 20%)                    | 223 (42.6)         |
| P53 overexpression                    |                    |
| Absent                                | 386 (73.7)         |
| Present                               | 138 (26.3)         |
| Subtype                               |                    |
| Luminal A                             | 225 (42.9)         |
| Luminal B                             | 139 (26.5)         |
| HER2+                                 | 64 (12.2)          |
| Triple negative                       | 96 (18.3)          |
| Neo-adjuvant chemotherapy             |                    |
| Not received                          | 491 (93.7)         |
| Received                              | 33 (6.3)           |
| Adjuvant chemotherapy*                |                    |
| Not received                          | 87 (16.6)          |
| Received                              | 431 (85.3)         |
| Adjuvant HER2-targeted therapy*       |                    |
| Not received                          | 460 (87.8)         |
| Received                              | 58 (11.1)          |
| Adjuvant radiation therapy*           |                    |
| Not received                          | 204 (38.9)         |
| Received                              | 314 (59.9)         |
| Adjuvant hormonal therapy*            |                    |
| Not received                          | 159 (30.3)         |
| Received                              | 359 (68.5)         |

Unless specified, number in parenthesis indicate percentage.

\*Information on adjuvant therapy could not be assessed in 6 cases due to follow-up loss.

**Supplementary Table S3. Relationship between S100A8 expression in tumor cells and immune cells and clinicopathological features of pre-invasive carcinoma**

| Clinicopathological feature | S100A8+ TC |           | <i>p</i> value | S100A8+ IC |           | <i>p</i> value |
|-----------------------------|------------|-----------|----------------|------------|-----------|----------------|
|                             | Negative   | Positive  |                | Negative   | Positive  |                |
| Extent                      |            |           | 0.012          |            |           | 0.238          |
| <3.2cm                      | 61 (50.0)  | 38 (70.4) |                | 49 (52.1)  | 50 (61.0) |                |
| ≥3.2cm                      | 61 (50.0)  | 16 (29.6) |                | 45 (47.9)  | 32 (39.0) |                |
| Nuclear grade               |            |           | 0.004          |            |           | 0.594          |
| Low                         | 10 (8.2)   | 1 (1.9)   |                | 7 (7.4)    | 4 (4.9)   |                |
| Intermediate                | 75 (61.5)  | 23 (42.6) |                | 54 (57.4)  | 44 (53.7) |                |
| High                        | 37 (30.3)  | 30 (55.6) |                | 33 (35.1)  | 34 (41.5) |                |
| Comedo-type necrosis        |            |           | 0.027          |            |           | 0.081          |
| Absent                      | 98 (80.3)  | 35 (64.8) |                | 76 (80.9)  | 57 (69.5) |                |
| Present                     | 24 (19.7)  | 19 (35.2) |                | 18 (19.1)  | 25 (30.5) |                |
| ER                          |            |           | <0.001         |            |           | 0.030          |
| Positive                    | 119 (97.5) | 35 (64.8) |                | 87 (92.6)  | 67 (81.7) |                |
| Negative                    | 3 (2.5)    | 19 (35.2) |                | 7 (7.4)    | 15 (18.7) |                |
| PR                          |            |           | <0.001         |            |           | 0.389          |
| Positive                    | 110 (90.2) | 24 (44.4) |                | 74 (78.7)  | 60 (73.2) |                |
| Negative                    | 12 (9.8)   | 30 (55.6) |                | 20 (21.3)  | 22 (26.8) |                |
| HER2 status                 |            |           | 0.001          |            |           | 0.147          |
| Negative                    | 112 (91.8) | 39 (72.2) |                | 84 (89.4)  | 67 (81.7) |                |
| Positive                    | 10 (8.2)   | 15 (27.8) |                | 10 (10.6)  | 15 (18.3) |                |
| Ki67 index                  |            |           | 0.036          |            |           | 0.087          |
| Low (<10%)                  | 111 (91.0) | 43 (79.6) |                | 86 (91.5)  | 68 (82.9) |                |
| High (≥10%)                 | 11 (9.0)   | 11 (20.4) |                | 8 (8.5)    | 14 (17.1) |                |
| P53 overexpression          |            |           | 0.005          |            |           | 0.134          |
| Absent                      | 113 (92.6) | 42 (77.8) |                | 86 (91.5)  | 69 (84.1) |                |
| Present                     | 9 (7.4)    | 12 (22.2) |                | 8 (8.5)    | 13 (15.9) |                |
| Subtype                     |            |           | <0.001         |            |           | 0.215          |
| Luminal A                   | 101 (82.8) | 26 (48.1) |                | 73 (77.7)  | 54 (65.9) |                |
| Luminal B                   | 18 (14.8)  | 10 (18.5) |                | 14 (14.9)  | 14 (17.1) |                |
| HER2+                       | 1 (0.8)    | 7 (13.0)  |                | 3 (3.2)    | 5 (6.1)   |                |
| Triple negative             | 2 (1.6)    | 11 (20.4) |                | 4 (4.3)    | 9 (11.0)  |                |

*P* values are calculated by Chi-square or Fisher's exact test. Number in parenthesis indicates percentage.

TC, tumor cell; IC, immune cell; ER, estrogen receptor; PR, progesterone receptor

**Supplementary Table S4. Relationship between S100A8 expression in tumor cells and immune cells and clinicopathological features of invasive carcinoma**

| Clinicopathological features | S100A8+ TC |            | <i>p</i> value | S100A8+ IC |            | <i>p</i> value |
|------------------------------|------------|------------|----------------|------------|------------|----------------|
|                              | Negative   | Positive   |                | Negative   | Positive   |                |
| T stage                      |            |            | 0.689          |            |            | 0.064          |
| T1                           | 166 (47.6) | 80 (45.7)  |                | 142 (50.7) | 104 (42.6) |                |
| T2-T4                        | 183 (52.4) | 95 (54.3)  |                | 138 (49.3) | 140 (57.4) |                |
| N stage                      |            |            | 0.880          |            |            | 0.068          |
| N0                           | 199 (57.0) | 101 (57.7) |                | 150 (53.6) | 150 (61.5) |                |
| N1-N3                        | 150 (43.0) | 74 (42.3)  |                | 130 (46.4) | 94 (38.5)  |                |
| Histologic grade             |            |            | <0.001         |            |            | <0.001         |
| Low                          | 85 (24.4)  | 9 (5.1)    |                | 72 (25.7)  | 22 (9.0)   |                |
| Intermediate                 | 136 (39.0) | 30 (17.1)  |                | 124 (44.3) | 42 (17.2)  |                |
| High                         | 128 (36.7) | 136 (77.7) |                | 84 (30.0)  | 180 (73.8) |                |
| LVI                          |            |            | 0.557          |            |            | 0.393          |
| Absent                       | 194 (55.6) | 102 (58.3) |                | 163 (58.2) | 133 (54.5) |                |
| Present                      | 155 (44.4) | 73 (41.7)  |                | 117 (41.8) | 111 (45.5) |                |
| ER                           |            |            | <0.001         |            |            | <0.001         |
| Positive                     | 287 (82.2) | 66 (37.7)  |                | 236 (84.3) | 117 (48.0) |                |
| Negative                     | 62 (17.8)  | 109 (62.3) |                | 44 (15.7)  | 127 (52.0) |                |
| PR                           |            |            | <0.001         |            |            | <0.001         |
| Positive                     | 227 (65.0) | 51 (29.1)  |                | 187 (66.8) | 91 (37.3)  |                |
| Negative                     | 122 (35.0) | 124 (70.9) |                | 93 (33.2)  | 153 (62.7) |                |
| HER2 status                  |            |            | <0.001         |            |            | <0.001         |
| Negative                     | 56 (16.0)  | 64 (36.6)  |                | 42 (15.0)  | 78 (32.0)  |                |
| Positive                     | 293 (84.0) | 111 (63.4) |                | 238 (85.0) | 166 (68.0) |                |
| Ki67 index                   |            |            | <0.001         |            |            | <0.001         |
| Low                          | 248 (71.1) | 53 (30.3)  |                | 214 (76.4) | 87 (35.7)  |                |
| High                         | 101 (28.9) | 122 (69.7) |                | 66 (23.6)  | 157 (64.3) |                |
| P53 overexpression           |            |            | <0.001         |            |            | <0.001         |
| Absent                       | 286 (81.9) | 100 (57.1) |                | 232 (82.9) | 154 (63.1) |                |
| Present                      | 63 (18.1)  | 75 (42.9)  |                | 48 (17.1)  | 90 (36.9)  |                |
| Subtype                      |            |            | <0.001         |            |            | <0.001         |
| Luminal A                    | 195 (55.9) | 30 (17.1)  |                | 169(60.4)  | 56 (23.0)  |                |
| Luminal B                    | 96 (27.5)  | 43 (24.6)  |                | 71 (25.4)  | 68 (27.9)  |                |
| HER2+                        | 19 (5.4)   | 45 (25.7)  |                | 16 (5.7)   | 48 (19.7)  |                |
| Triple negative              | 39 (11.2)  | 57 (33.4)  |                | 24 (8.6)   | 72 (29.5)  |                |

*P* values are calculated by Chi-square or Fisher's exact test. Number in parenthesis indicates percentage.

TC, tumor cell; IC, immune cell; LVI, lymphovascular invasion; ER, estrogen receptor; PR, progesterone receptor

**Supplementary Table S5. Correlations between S100A8+ immune cells, infiltration of CD4+, CD8+, and FOXP3+ tumor infiltrating lymphocytes and PD-L1+ immune cells in pre-invasive and invasive carcinoma**

| <b>Disease group</b>   | <b>Correlation between markers</b> | <b>S100A8+ IC</b> | <b>CD4+ TIL</b> | <b>CD8+ TIL</b> | <b>FOXP3+ TIL</b> | <b>PD-L1+ IC</b> |
|------------------------|------------------------------------|-------------------|-----------------|-----------------|-------------------|------------------|
| Pre-invasive carcinoma | S100A8+ IC                         | -                 | 0.281 (<0.001)  | 0.249 (0.001)   | 0.209 (0.006)     | 0.248 (0.001)    |
|                        | CD4+ TIL                           | 0.281 (<0.001)    | -               | 0.610 (<0.001)  | 0.463 (<0.001)    | 0.391 (<0.001)   |
|                        | CD8+ TIL                           | 0.249 (0.001)     | 0.610 (<0.001)  | -               | 0.458 (<0.001)    | 0.344 (<0.001)   |
|                        | FOXP3+ TIL                         | 0.209 (0.006)     | 0.463 (<0.001)  | 0.458 (<0.001)  | -                 | 0.434 (<0.001)   |
|                        | PD-L1+ IC                          | 0.248 (0.001)     | 0.391 (<0.001)  | 0.344 (<0.001)  | 0.434 (<0.001)    | -                |
| Invasive carcinoma     | S100A8+ IC                         | -                 | 0.263 (<0.001)  | 0.474 (<0.001)  | 0.482 (<0.001)    | 0.525 (<0.001)   |
|                        | CD4+ TIL                           | 0.263 (<0.001)    | -               | 0.487 (<0.001)  | 0.306 (<0.001)    | 0.336 (<0.001)   |
|                        | CD8+ TIL                           | 0.474 (<0.001)    | 0.487 (<0.001)  | -               | 0.588 (<0.001)    | 0.616 (<0.001)   |
|                        | FOXP3+ TIL                         | 0.482 (<0.001)    | 0.306 (<0.001)  | 0.588 (<0.001)  | -                 | 0.565 (<0.001)   |
|                        | PD-L1+ IC                          | 0.525 (<0.001)    | 0.336 (<0.001)  | 0.616 (<0.001)  | 0.565 (<0.001)    | -                |

Data are presented as rho correlation coefficients calculated by Spearman's rank correlation test and p values in parentheses.

TIL, tumor-infiltrating lymphocyte; IC, immune cell
